# Supplementary material for: Enhanced efficiency of antiseptics with sustained release from clay nanotubes
Source: Royal Society of Chemistry journal article supplement (doi:10.1039/c3ra45011b), 2013-11-01
Supplement: c3ra45011b.pdf [file c3ra45011b.pdf]

## Supplementary data

# Enhanced Efficiency of Antiseptics with Sustained Release from Clay Nanotubes

Wenbo Wei<sup>1</sup>, Renata Minullina<sup>1,2</sup>, Elshad Abdullayev<sup>1,3</sup>, Rawil Fakhrullin<sup>2</sup>, David Mills<sup>1</sup>, Yuri Lvov<sup>1\*</sup>

<sup>1</sup> Institute for Micromanufacturing and Biomedical Engineering Program, Louisiana Tech University, Ruston, LA, USA

<sup>2</sup> Microbiology Department, Kazan Federal University, Kazan, Tatarstan, Russian Federation

<sup>3</sup> Applied Minerals, Inc., New York, NY, USA

\*Corresponding author at: Institute for Micromanufacturing, Louisiana Tech University, 911 Hergot Ave., Ruston, LA, 71270. E-mail address: [ylvov@coes.latech.edu](mailto:ylvov@coes.latech.edu) (Y. Lvov).

☆**Conflict of interest:** The authors have declared no conflicts of interest

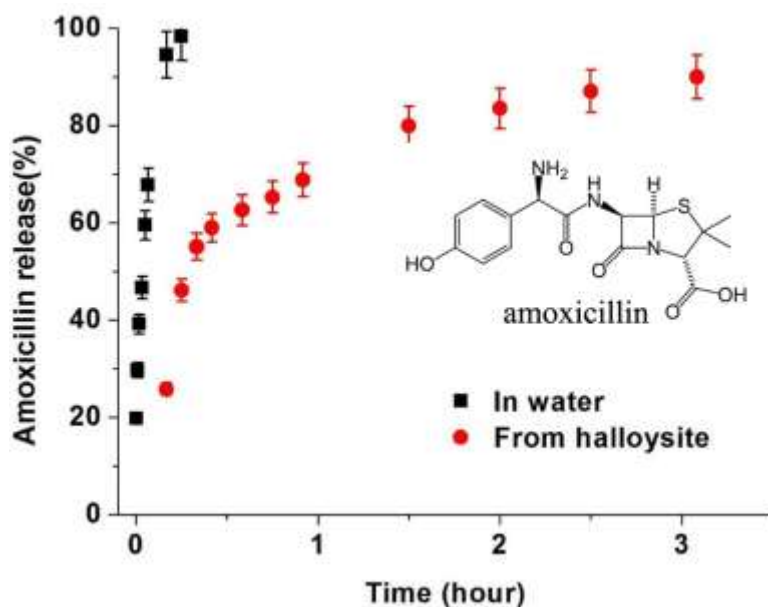

Figure S1. Release of amoxicillin from halloysite and in water. Compare with free amoxicillin release in water only 15 minutes, the loaded amoxicillin release 90% in three hours.

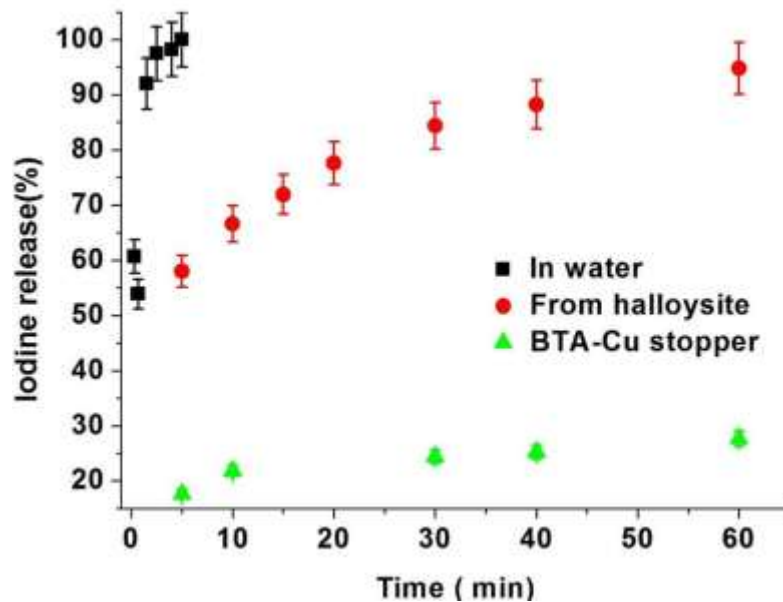

Figure S2. Iodine dissolution in water, and extended release of iodine encapsulated in halloysite, and halloysite with BTA-Cu tube-end stoppers. Free non-formulated iodine release in water within about 5 minutes, iodine loaded halloysite release 90% in 1 hour, however, loaded iodine with additional stopper significantly reduced release to 30% in 1 hour.
